# Supplementary material
Source: JCI journal article supplement (doi:10.1172/jci189636)
Supplement: sd1 [file 1]

# Supplemental Figure 1

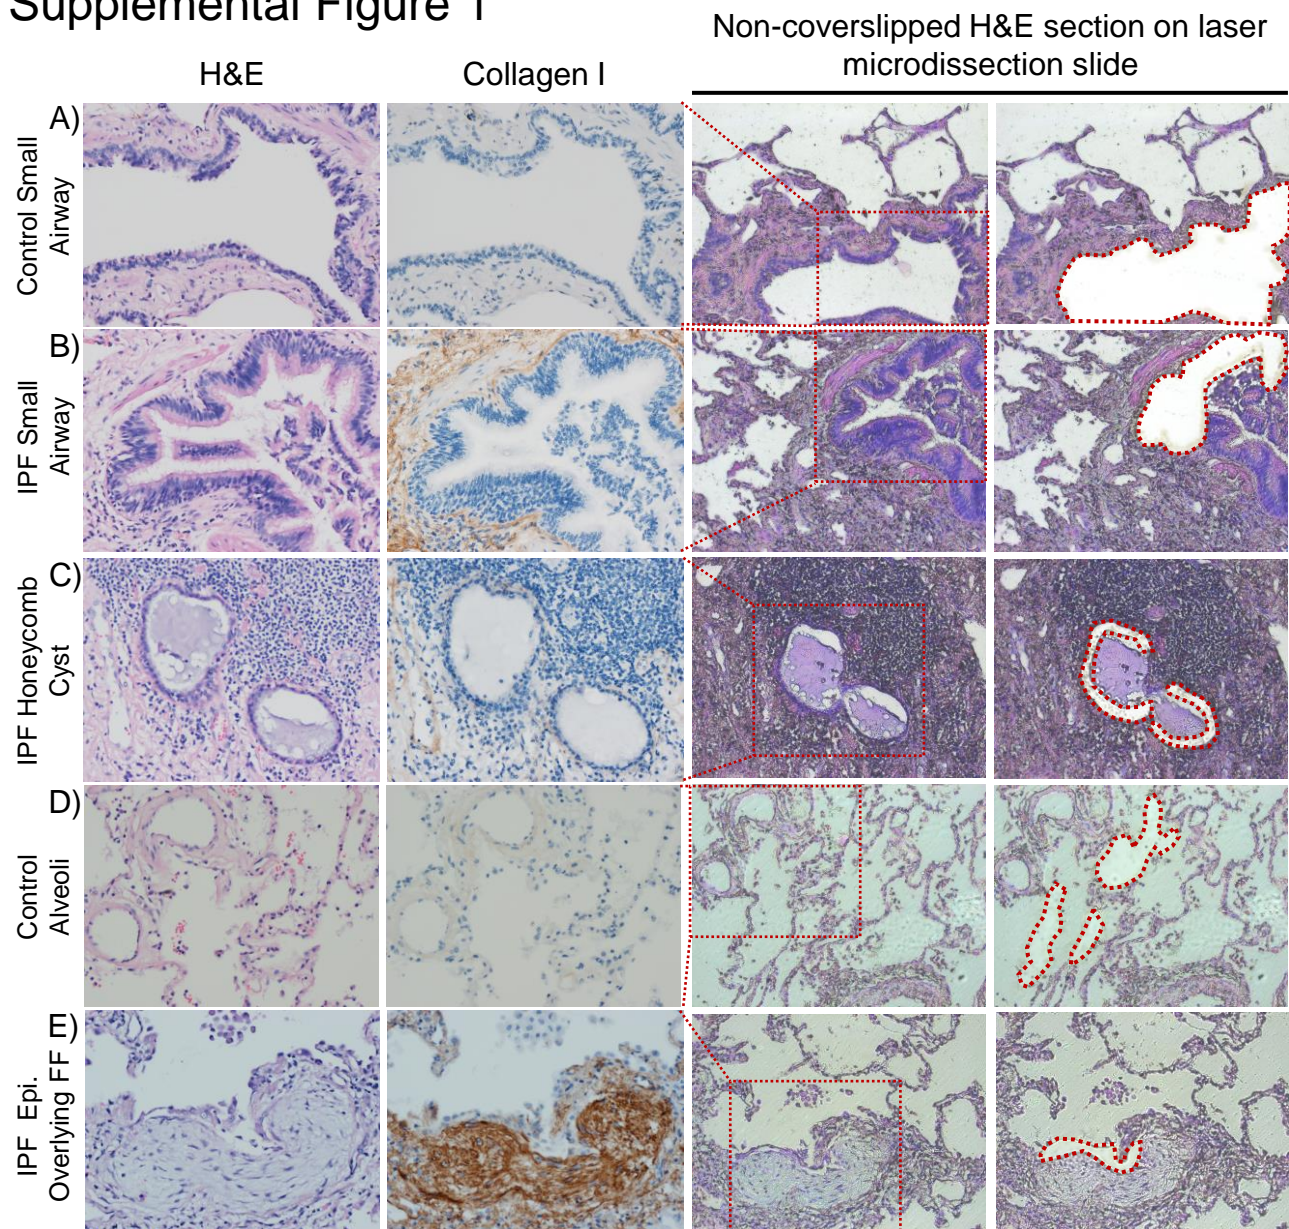

**Supplemental Figure 1: Our laser capture microdissection approach.** Herein we show our capacity to precisely capture regions of interest using both H&E and collagen I as a guide. A representative image of the capture of a (A) non-fibrotic control airway, (B) IPF small airway (C) IPF honeycomb cyst, and (D) non-fibrotic control alveoli. In the next set of panels, we laser capture the (E) epithelia overlying fibroblastic foci (FF), (F) IPF FF, and (G) IPF alveoli from the same region. The furthest right panel shows the regions captured (outlined by a red dotted line).

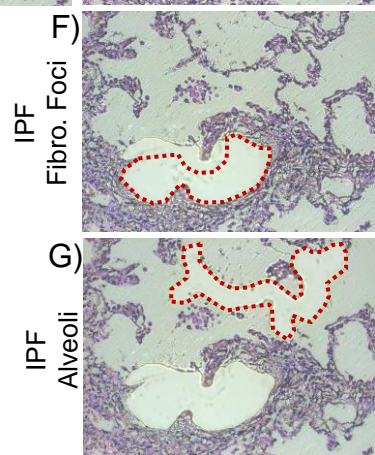

# Supplemental Figure 2

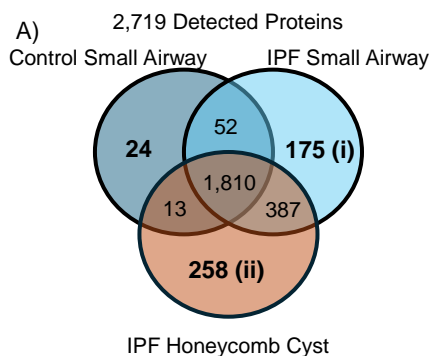

(i) IPF Small Airway  
Gene Enrichment Analysis

| Reactome Pathway                                   | FDR     | Fold-Enrichment |
|----------------------------------------------------|---------|-----------------|
| Anchoring of the basal body to the plasma membrane | 7.8E-05 | <b>11.85</b>    |
| Cilium Assembly                                    | 4.7E-04 | <b>6.83</b>     |

(ii) IPF Honeycomb Cysts  
Gene Enrichment Analysis

| Reactome Pathway         | FDR     | Fold-Enrichment |
|--------------------------|---------|-----------------|
| Membrane Trafficking     | 1.7E-03 | <b>3.06</b>     |
| Neutrophil degranulation | 3.0E-03 | <b>3.2</b>      |
| Innate Immune System     | 1.2E-02 | <b>2.2</b>      |
| RHOQ GTPase cycle        | 4.9E-02 | <b>7.78</b>     |

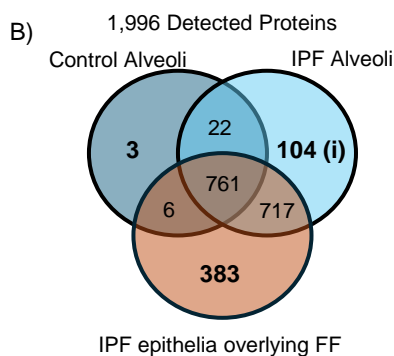

(i) IPF Alveoli  
Gene Enrichment Analysis

| Reactome Pathway                           | FDR     | Fold-Enrichment |
|--------------------------------------------|---------|-----------------|
| Regulation of insulin secretion            | 3.3E-05 | <b>20.11</b>    |
| Integration of energy metabolism           | 1.1E-04 | <b>14.66</b>    |
| G-protein activation                       | 5.0E-03 | <b>32.69</b>    |
| Thromboxane signalling through TP receptor | 6.0E-03 | <b>32.69</b>    |
| ADP signaling through P2Y purinoceptor 1   | 7.5E-03 | <b>32.69</b>    |

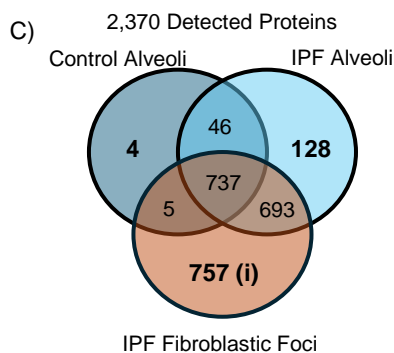

(i) IPF Fibroblastic Foci  
Gene Enrichment Analysis

| Reactome Pathway                                                        | FDR     | Fold-Enrichment |
|-------------------------------------------------------------------------|---------|-----------------|
| Non-integrin membrane-ECM interactions                                  | 4.6E-07 | <b>6.67</b>     |
| Ribosomal scanning and start codon recognition                          | 3.3E-06 | <b>6.22</b>     |
| Translation initiation complex formation                                | 1.7E-05 | <b>5.78</b>     |
| Activation of the mRNA upon binding of the cap-binding complex and eIFs | 1.9E-05 | <b>5.68</b>     |
| Collagen biosynthesis and modifying enzymes                             | 1.2E-05 | <b>5.48</b>     |
| Signaling by MET                                                        | 1.0E-05 | <b>5.17</b>     |
| ECM Proteoglycan                                                        | 1.1E-05 | <b>5.17</b>     |
| Collagen formation                                                      | 3.5E-06 | <b>5.01</b>     |

**Supplemental Figure 2: Qualitative spatial analysis of IPF.** Venn diagrams of detected proteins in (A) airway (B) alveolar, and (C) fibroblastic foci. A protein was considered detected if found in 80% of samples per group (left diagrams). A gene enrichment analysis of the uniquely expressed proteins using [www.pantherdb.org](http://www.pantherdb.org) is shown on the right. For the fibroblastic foci, we focused on the 50 most significantly regulated pathways of 357 arranged by fold-enrichment. N = 12 per group (n = 20 for fibroblastic foci).

# Supplemental Figure 3

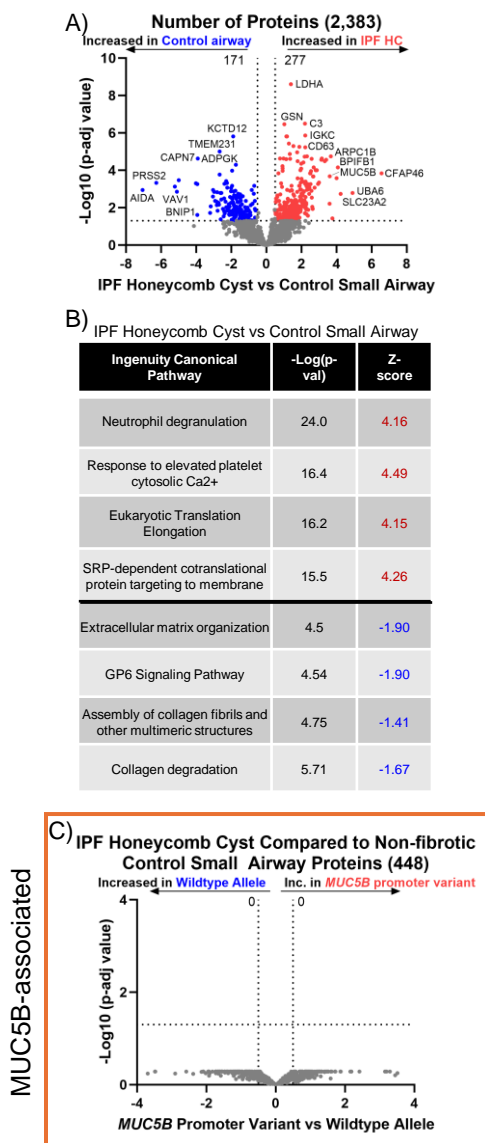

**Supplemental Figure 3: IPF honeycomb cysts demonstrate deranged ECM remodeling. (A & C)** Volcano plot comparing IPF honeycomb cysts and non-fibrotic control small airways (A) for the number of proteins analyzed and (C) the subset of significantly changed proteins from (A) comparing for the *MUC5B* promoter variant, showing the negative natural log of p-adjusted values plotted against the base 2 log (fold change) for each protein. **(B)** Ingenuity pathway analysis showing the top 4 most upregulated (positive Z-score in red font) or top 4 most downregulated (negative Z-score in blue font) pathways per comparison. N = 12 per group.

# Supplemental Figure 4

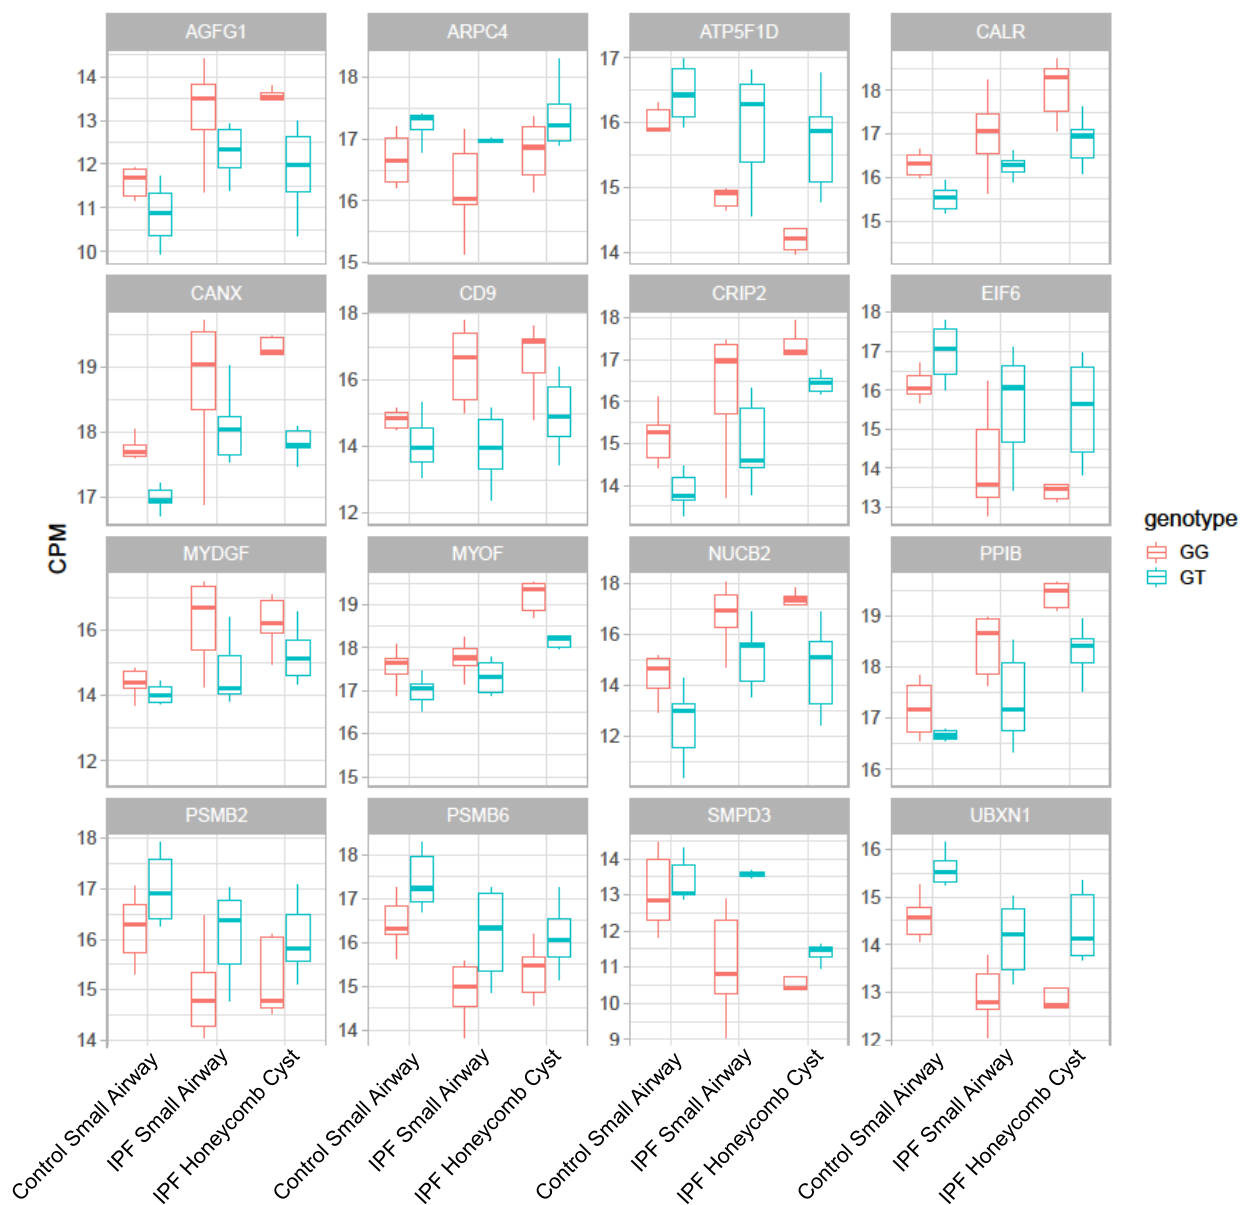

**Supplemental Figure 4: Impact of *MUC5B* promoter variant on the proteomic profiles of airways.** Shown is the effect of *MUC5B* promoter variant (GT) on control small airway, IPF small airway, or IPF honeycomb cyst (n = 6 per group). Although underpowered per group individually, our combined analysis when controlling for disease identified 11 significantly changed proteins when comparing for *MUC5B* promoter variant (original Figure 4E).

# Supplemental Figure 5

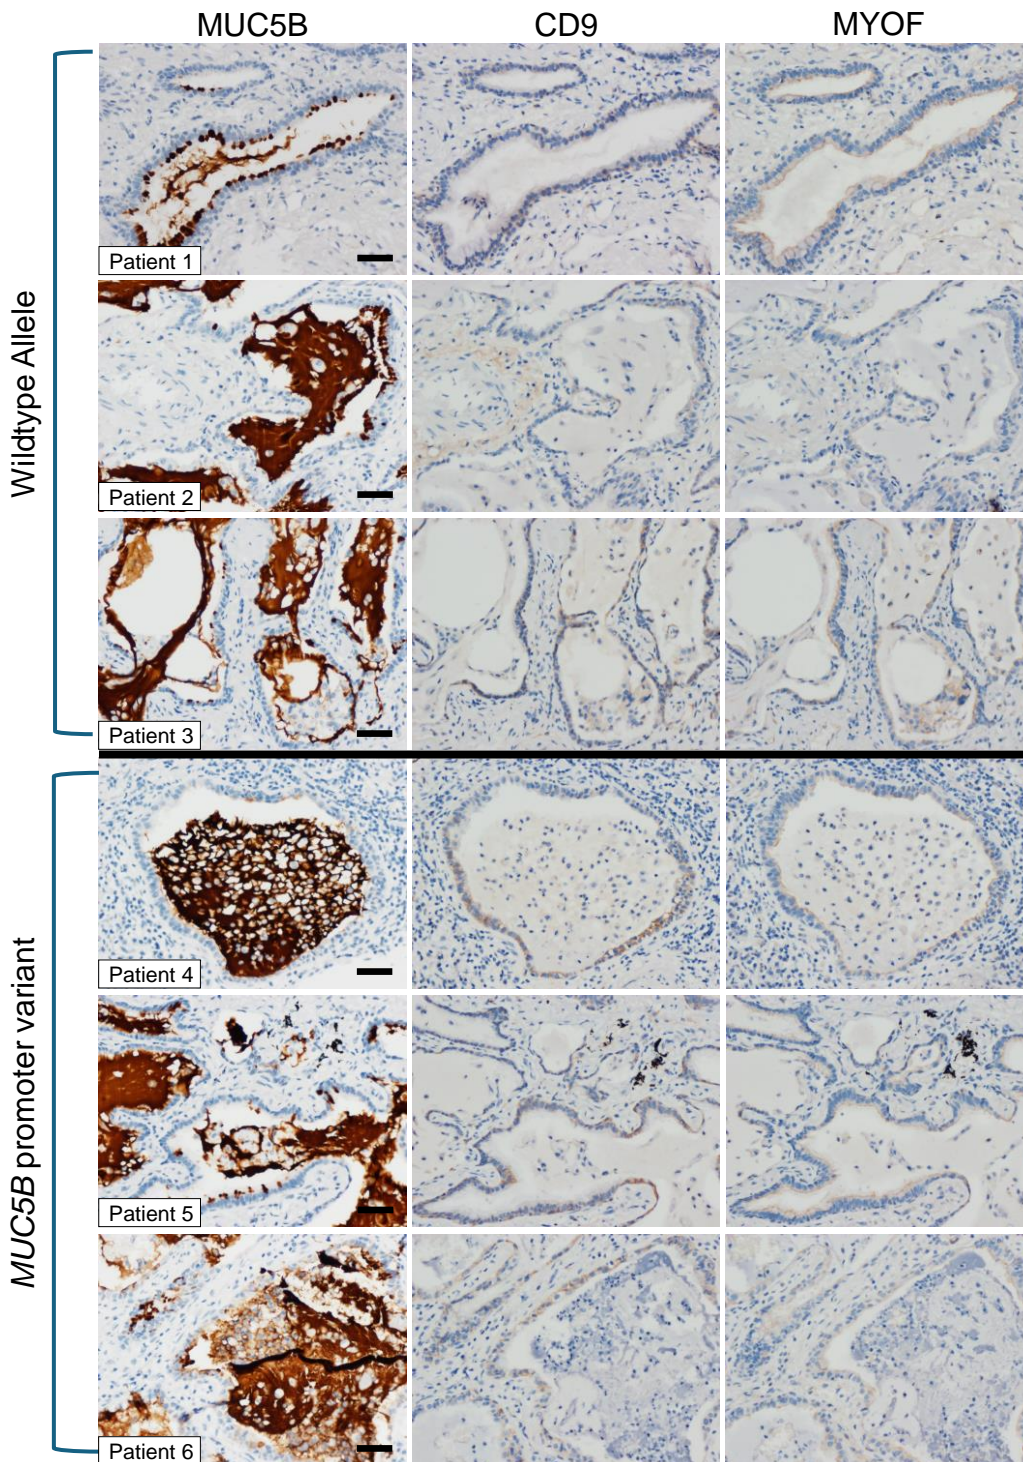

**Supplemental Figure 5: Expression of CD9 and MYOF in IPF honeycomb cyst:** Immunohistochemistry against MUC5B, CD9, and MYOF in 6 IPF specimens (3 wildtype allele and 3 *MUC5B* promoter variant). Scale bar represents 50 microns.

# Supplemental Figure 6

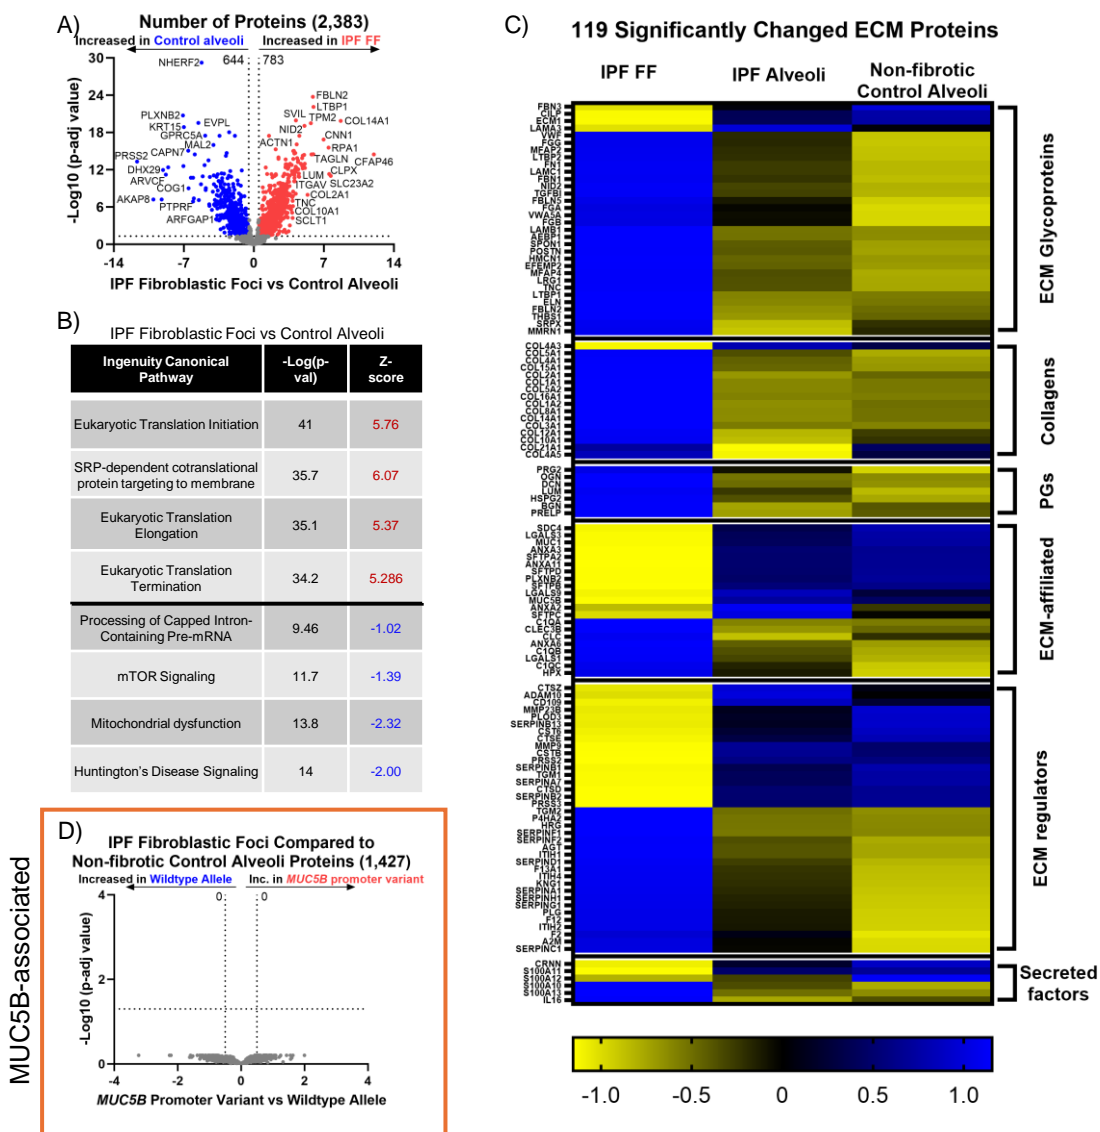

**Supplemental Figure 6: IPF fibroblastic foci are defined by increased translational control. (A & D)** (A) Volcano plot comparing IPF FF and non-fibrotic control alveoli and, (D) the subset of significantly changed proteins from (A) when comparing the *MUC5B* promoter variant, showing the negative natural log of p-adjusted values plotted against the base 2 log (fold change) for each protein. **(B)** Ingenuity pathway analysis showing the top 4 most upregulated (positive Z-score in red font) or top 4 most downregulated (negative Z-score in blue font) pathways. **(C)** A heatmap displaying Z-scores on the significantly changed extracellular matrix proteins categorized by their groups comparing IPF FF, IPF alveoli, and non-fibrotic control alveoli. N= 12 per group (n = 20 FF, balanced for the *MUC5B* promoter variant).

# Supplemental Figure 7

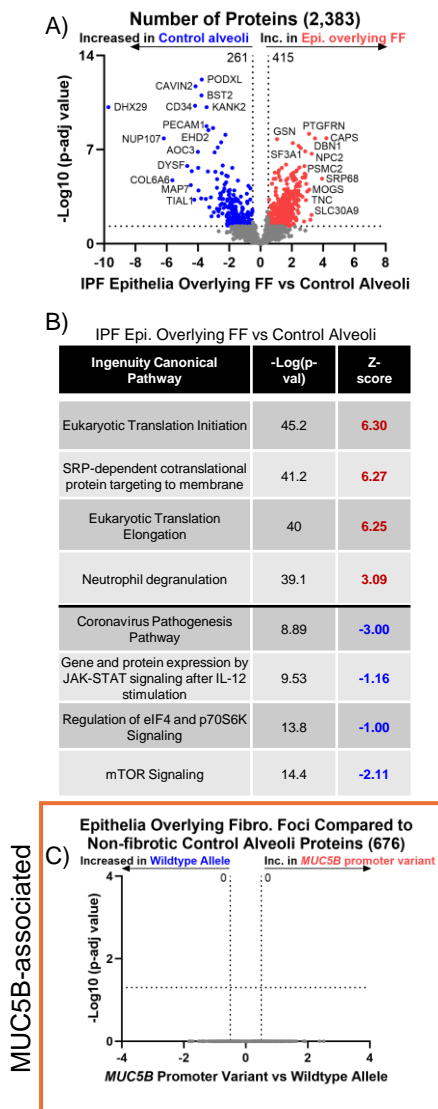

**Supplemental Figure 7: IPF epithelia overlying fibroblastic foci demonstrate increased translational control. (A & C)** Volcano plot comparing (A) IPF epithelia overlying FF and non-fibrotic control alveoli, and (C) the subset of significantly changed proteins in (A) assessed for the *MUC5B* promoter variant, showing the negative natural log of p-adjusted values plotted against the base 2 log (fold change) for each protein. **(B)** Ingenuity pathway analysis showing the top 4 most upregulated (positive Z-score in red font) or top 4 most downregulated (negative Z-score in blue font) pathways per comparison. N = 12 per group.

## Supplemental Figure 8

| Control or IPF | MUC5B Genotype | Age | Sex    | Smoking Status | Ethnicity/Race     |
|----------------|----------------|-----|--------|----------------|--------------------|
| Control        | GG             | 69  | Male   | Former         | Non-Hispanic White |
| Control        | GG             | 47  | Male   | Current        | Unknown            |
| Control        | GG             | 71  | Male   | Former         | Non-Hispanic White |
| Control        | GG             | 62  | Female | Never          | Unknown            |
| Control        | GG             | 57  | Male   | Never          | European decent    |
| Control        | GG             | 79  | Female | Never          | Non-Hispanic White |
| Control        | GT             | 67  | Female | Unknown        | Non-Hispanic White |
| Control        | GT             | 74  | Male   | former         | Non-Hispanic White |
| Control        | GT             | 49  | Female | Former         | Non-Hispanic White |
| Control        | GT             | 66  | Male   | Former         | Non-Hispanic White |
| Control        | GT             | 66  | Male   | Former         | Non-Hispanic White |
| Control        | GT             | 63  | Male   | Former         | Non-Hispanic White |
| IPF            | GG             | 65  | Male   | Former         | Non-Hispanic White |
| IPF            | GG             | 59  | Female | Never          | Non-Hispanic White |
| IPF            | GG             | 66  | Male   | Former         | Non-Hispanic White |
| IPF            | GG             | 68  | Male   | Former         | Non-Hispanic White |
| IPF            | GG             | 52  | Male   | Former         | Non-Hispanic White |
| IPF            | GG             | 68  | Female | Former         | Non-Hispanic White |
| IPF            | GT             | 66  | Male   | Never          | Non-Hispanic White |
| IPF            | GT             | 71  | Female | Former         | Non-Hispanic White |
| IPF            | GT             | 69  | Female | Former         | Non-Hispanic White |
| IPF            | GT             | 68  | Female | Never          | Non-Hispanic White |
| IPF            | GT             | 68  | Male   | Former         | Non-Hispanic White |
| IPF            | GT             | 65  | Male   | Never          | Non-Hispanic White |

**Supplemental Figure 8: Patient demographics.** For the *MUC5B* promoter variant genotype, our wildtype allele is represented as GG whereas all the specimens (control and IPF) that harbor the *MUC5B* promoter variant are heterozygous (GT).
